# Supplementary material for: Boosting C2 products in electrochemical CO2 reduction over highly dense copper nanoplates
Source: Royal Society of Chemistry journal article supplement (doi:10.1039/d0cy00487a), 2020-01-01
Supplement: d0cy00487a1.pdf [file d0cy00487a1.pdf]

## Supporting Information

### **Boosting C<sub>2</sub> Products in Electrochemical CO<sub>2</sub> Reduction over Highly Dense Copper Nanoplates**

Saira Ajmal<sup>a</sup>, Yang Yang<sup>a</sup>, Muhammad Ali Tahir<sup>a</sup>, Kejian Li<sup>a</sup>, Aziz-Ur-Rahim Bacha<sup>a</sup>, Iqra Nabi<sup>a</sup>, Yangyang Liu<sup>a</sup>, Tao Wang<sup>a</sup>, and Liwu Zhang<sup>a,b,\*</sup>

<sup>a</sup> *Shanghai Key Laboratory of Atmospheric Particle Pollution and Prevention, Department of Environmental Science & Engineering, Fudan University, Shanghai, 200433, Peoples' Republic of China*

<sup>b</sup> *Shanghai Institute of Pollution Control and Ecological Security, Shanghai, 200092, Peoples' Republic of China*

#### **Corresponding Author**

\*Liwu Zhang

Email: zhanglw@fudan.edu.cn

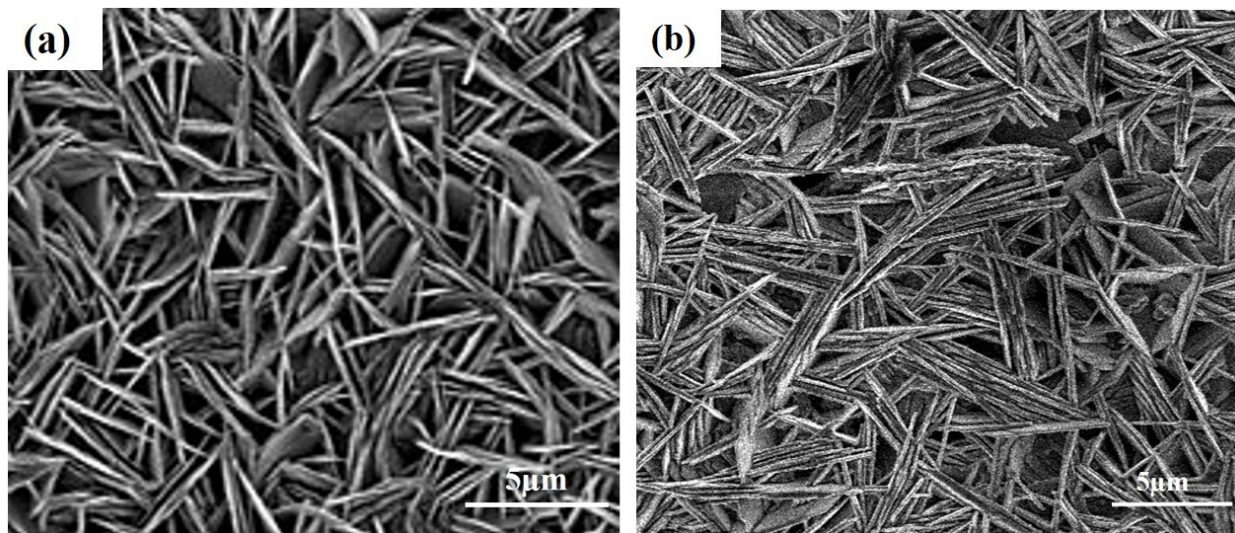

**Fig. S1.** Large Scale SEM images of (a) Cu-Nplate1, (b) Cu-Nplate2

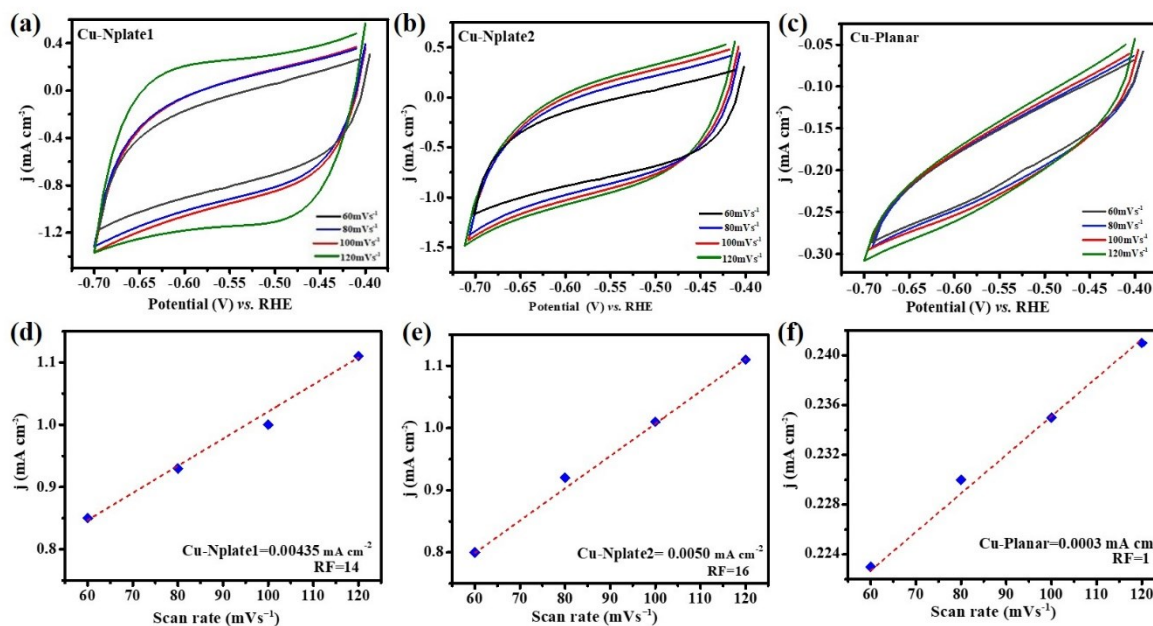

**Fig. S2.** Cyclic voltammetry curves of (a) Cu-Nplate1, (b) Cu-Nplate2 and (c) Cu-Planar. The double layer was obtained from the corresponded values of current verses scan rate of plot of (a) Cu-Nplate1, (b) Cu-Nplate2 and (c) Cu-Planar.

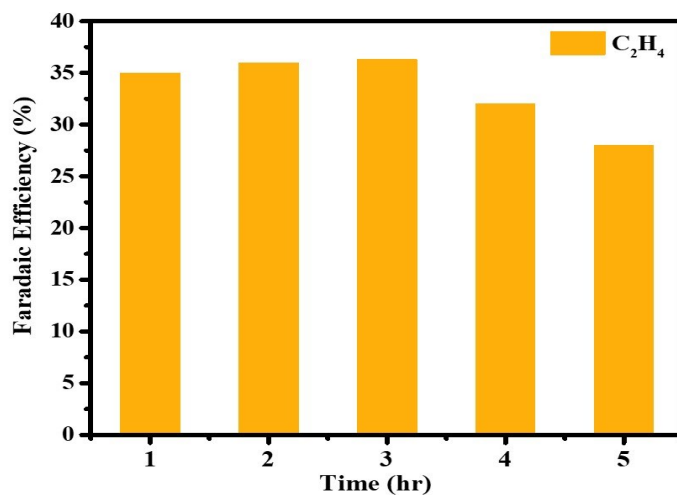

**Fig. S3.** The FE of C<sub>2</sub>H<sub>4</sub> of Cu-Nplate2 at potential -1.9V for 5 cycles.

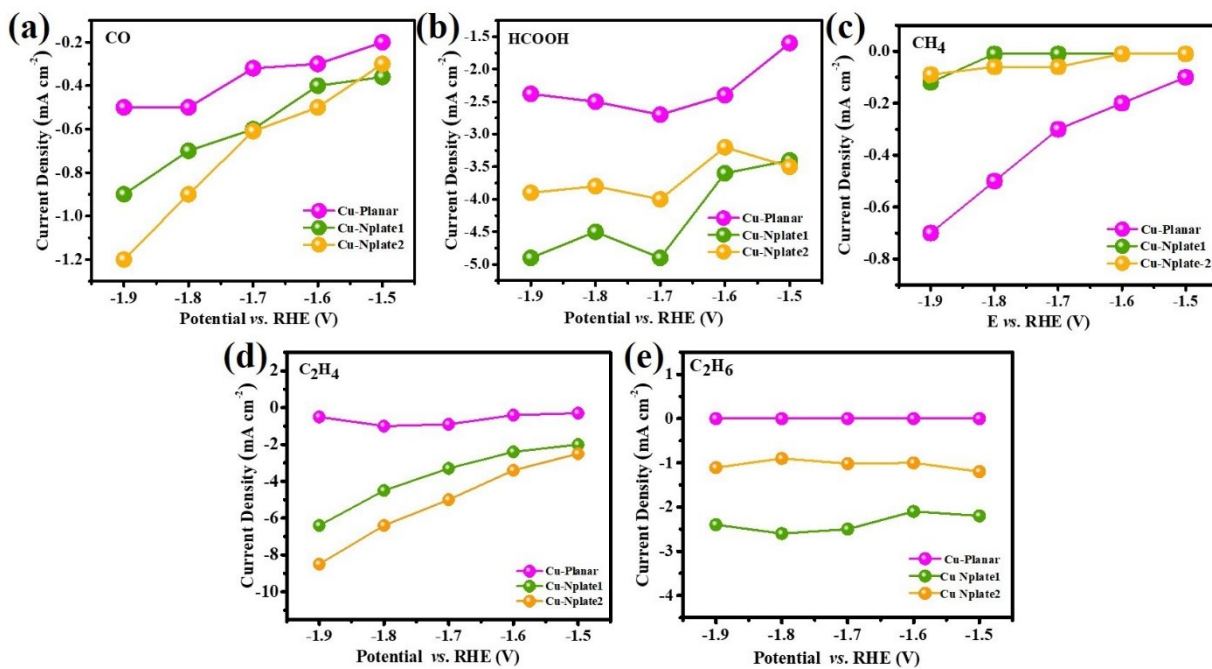

**Fig. S4.** Current density versus applied potential of CO<sub>2</sub> electrochemical reduction on Cu-Planar, Cu-Nplate1 and Cu-Nplate2 (a) CO (b) CH<sub>4</sub> (c) C<sub>2</sub>H<sub>4</sub> (d) C<sub>2</sub>H<sub>6</sub> and (e) (HCOOH).

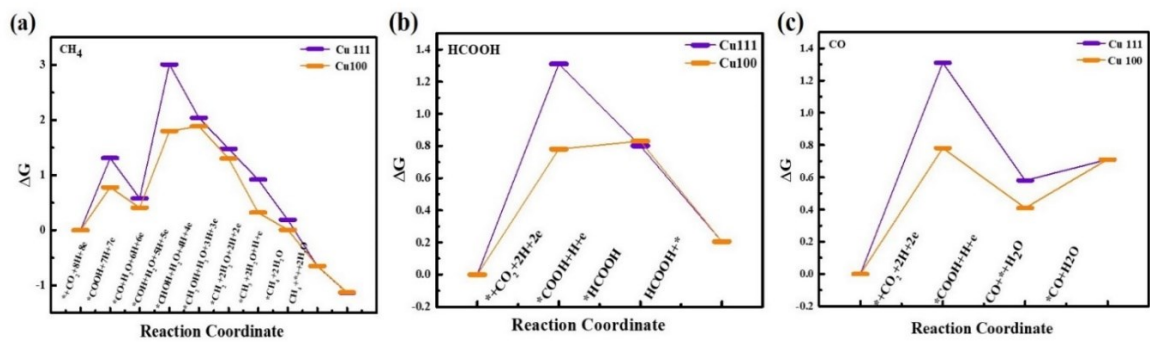

Fig. S5. Free energy diagram of C1 reaction pathway on Cu111 and Cu100 facets.
